# Supplementary material
Source: PubMed Central journal article supplement (PMC2910385)
Supplement: supp_dev.050096_DEV050096TableS1.pdf [file supp_dev.050096_DEV050096TableS1.pdf]

**Table S1. Oligonucleotides for cadherin 6B shRNA expression construct**

| Strand        | Sequence                                                              |
|---------------|-----------------------------------------------------------------------|
| Top strand    | 5'-gatccGGATTCAGCCACAATCAGAttcaagagaTCTGATTGTGGCTGAATCCttttttggaaa-3' |
| Bottom strand | 5'-agcttttccaaaAAGGATTCAGCCACAATCAGAtctcttgaaTCTGATTGTGGCTGAATCCg-3'  |
